# Supplementary material for: Transient non-integrative expression of nuclear reprogramming factors promotes multifaceted amelioration of aging in human cells
Source: PubMed Central journal article supplement (PMC7093390; doi:10.1038/s41467-020-15174-3), 2020-03-24
Supplement: 41467_2020_15174_MOESM4_ESM.pdf [file 41467_2020_15174_MOESM4_ESM.pdf]

## **Description of Additional Supplementary Files**

File Name: Supplementary Data 1

Description: Y vs A gene signature in Fibroblasts

File Name: Supplementary Data 2

Description: Y vs A gene signature in Endothelial Cells

File Name: Supplementary Data 3

Description: MSigDB Y vs A Fibroblasts

File Name: Supplementary Data 4

Description: MSigDB Y vs A Endothelial Cells

File Name: Supplementary Data 5

Description: T vs A gene signature in Fibroblasts

File Name: Supplementary Data 6

Description: T vs A gene signature in Endothelial Cells

File Name: Supplementary Data 7

Description: MSigDB T vs A Fibroblasts

File Name: Supplementary Data 8

Description: MSigDB T vs A Endothelial Cells

File Name: Supplementary Data 9

Description: Overlap Signature in Fibroblasts

File Name: Supplementary Data 10

Description: Overlap Signature in Endothelial Cells

File Name: Supplementary Data 11

Description: Cell type specific markers

File Name: Supplementary Data 12

Description: Hallmarks of aging
